# Supplementary material for: Evaluation of Temperature-Based Empirical Models and Machine Learning Techniques to Estimate Daily Global Solar Radiation at Biratnagar Airport, Nepal
Source: Hindawi journal article supplement (doi:10.1155/2020/8895311), 2020-09-16
Supplement: f1 [file 8895311.f1.zip]

Archive with 1 entries (1 files):
- 8895311.f1/Supplementary File.rar
